# Supplementary material for: The Potential of JAG Ligands as Therapeutic Targets and Predictive Biomarkers in Multiple Myeloma
Source: MDPI journal article supplement (doi:10.3390/ijms241914558), 2023-09-26
Supplement: s1 [file s1]

## JAG1 expression level

**OS**

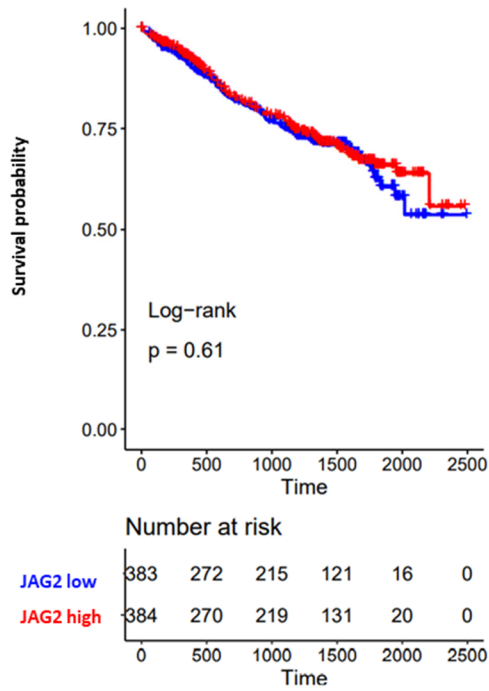

**PFS**

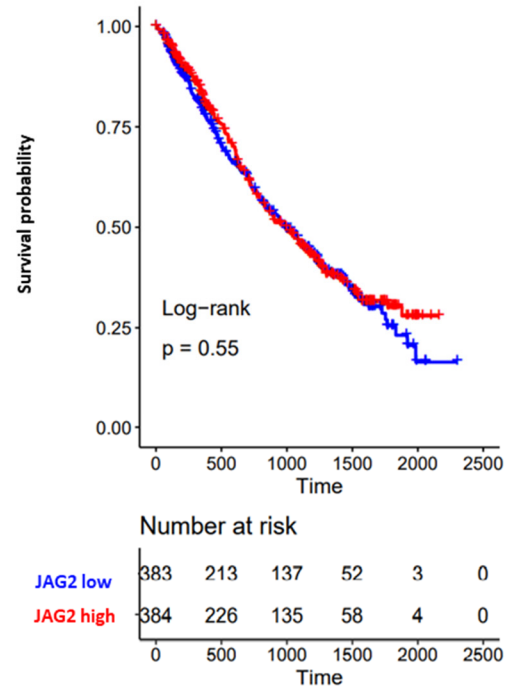

**Figure S1:** Kaplan-Meier survival curves in 767 MM with JAG1 expression, molecular and clinical data available. Log-rank test p-value measuring the global difference between survival curves and number of samples at risk in each group across time are reported.

**A**

| Variable                         | N (%)    | OS Univariate Cox Analysis |           |                    |
|----------------------------------|----------|----------------------------|-----------|--------------------|
|                                  |          | HR (95% CI)                | P-value   | Adj. P-value       |
| high JAG2                        | 252(50)  | 1.9 (1.3-2.8)              | 0.000709  | <b>0.00248**</b>   |
| Age (≥ 65 yrs)                   | 206 (41) | 2.12 (1.46-3.08)           | 0.0000868 | <b>0.0005***</b>   |
| ISS I                            | 187 (38) | 0.31 (0.19-0.50)           | 1.86E-06  | <b>0.00002****</b> |
| ISS II                           | 171 (34) | 1.13 (0.78-1.64)           | 0.524     | 0.6875             |
| ISS III                          | 139 (28) | 2.45 (1.70-3.53)           | 1.62E-06  | <b>0.00002****</b> |
| del(1p)/CDKN2C                   | 143 (29) | 1.61 (1.10-2.35)           | 0.0148    | <b>0.03807*</b>    |
| del(13q)/RB1                     | 258 (52) | 2.11 (1.44-3.09)           | 0.000119  | <b>0.00045***</b>  |
| HD                               | 281 (56) | 0.64 (0.44-0.92)           | 0.0149    | <b>0.0347*</b>     |
| TP53.alterations                 | 40 (8)   | 1.05 (0.53-2.07)           | 0.892     | 0.892              |
| 1q21 gain/amp                    | 164 (33) | 1.68 (1.17-2.43)           | 0.0051    | <b>0.0153*</b>     |
| TP53.alterations + 1q21 gain/amp | 19 (4)   | 3.63 (1.89-6.97)           | 0.000103  | <b>0.0005***</b>   |
| DIS3 mut                         | 50 (10)  | 1.63 (1.06-2.50)           | 0.0264    | 0.052              |
| N-RAS mut                        | 117 (23) | 0.90 (0.62-1.32)           | 0.596     | 0.732              |
| K-RAS mut                        | 121 (24) | 1.07 (0.77-1.49)           | 0.694     | 0.762              |
| BRAF mut                         | 36 (7)   | 1.18 (0.60-2.31)           | 0.628     | 0.732              |
| FAM46C mut                       | 49 (10)  | 0.78 (0.42-1.43)           | 0.419     | 0.586              |
| TRAF3 mut                        | 38 (7)   | 0.42 (0.17-1.06)           | 0.0668    | 0.107              |
| t(11;14)                         | 102 (20) | 0.92 (0.58-1.46)           | 0.726     | 0.762              |
| t(4;14)                          | 69 (14)  | 1.63 (1.04-2.55)           | 0.0335    | 0.058              |
| MAF.trx                          | 33 (7)   | 1.96 (1.08-3.57)           | 0.0276    | 0.052              |
| MYC.trx                          | 20 (4)   | 1.92 (0.94-3.94)           | 0.0748    | 0.112              |

**B**

| Variable                         | N (%)    | PFS Univariate Cox Analysis |            |                    |
|----------------------------------|----------|-----------------------------|------------|--------------------|
|                                  |          | HR (95% CI)                 | P-value    | Adj. P-value       |
| high JAG2                        | 252 (50) | 1.7 (1.3-2.2)               | 0.00191    | <b>0.00573**</b>   |
| Age (≥ 65 yrs)                   | 206 (41) | 1.59 (1.23-2.05)            | 0.000372   | <b>0.0019**</b>    |
| ISS I                            | 187 (38) | 0.44 (0.34-0.61)            | 0.00000012 | <b>0.00000****</b> |
| ISS II                           | 171 (34) | 1.2 (0.91-1.5)              | 0.213      | 0.319              |
| ISS III                          | 139 (28) | 1.9 (1.48-2.5)              | 0.00000114 | <b>0.00001****</b> |
| del(1p)/CDKN2C                   | 143 (29) | 1.3 (0.98-1.71)             | 0.0646     | 0.104              |
| del(13q)/RB1                     | 258 (52) | 1.7 (1.32-2.21)             | 0.0000471  | <b>0.00032***</b>  |
| HD                               | 281 (56) | 0.66 (0.52-0.86)            | 0.00166    | <b>0.0057**</b>    |
| TP53.alterations                 | 40 (8)   | 0.85 (0.52-1.4)             | 0.511      | 0.670              |
| 1q21 gain/amp                    | 164 (33) | 1.52 (1.17-1.97)            | 0.00151    | <b>0.0057**</b>    |
| TP53.alterations + 1q21 gain/amp | 19 (4)   | 2.46 (1.38-4.41)            | 0.00243    | <b>0.0063**</b>    |
| DIS3 mut                         | 50 (10)  | 1.62 (1.18-2.22)            | 0.00308    | <b>0.0071**</b>    |
| N-RAS mut                        | 117 (23) | 1.01 (0.79-1.29)            | 0.924      | 0.924              |
| K-RAS mut                        | 121 (24) | 1.03 (0.80-1.31)            | 0.827      | 0.868              |
| BRAF mut                         | 36 (7)   | 0.88 (0.52-1.48)            | 0.626      | 0.773              |
| FAM46C mut                       | 49 (10)  | 1.07 (0.74-1.52)            | 0.728      | 0.804              |
| TRAF3 mut                        | 38 (7)   | 0.80 (0.52-1.22)            | 0.297      | 0.415              |
| t(11;14)                         | 102 (20) | 0.94 (0.68-1.30)            | 0.694      | 0.804              |
| t(4;14)                          | 69 (14)  | 1.6 (1.14-2.23)             | 0.00612    | <b>0.012*</b>      |
| MAF.trx                          | 33 (7)   | 1.63 (1.03-2.57)            | 0.0376     | 0.065              |
| MYC.trx                          | 20 (4)   | 1.94 (1.13-3.33)            | 0.0163     | <b>0.031*</b>      |

**Figure S2:** Results of Cox regression univariate analysis using OS **(A)** or PFS **(B)** data on JAG2 expression groups, age equal to or greater than 65 years, ISS subgroups and main molecular alterations in 497 BM-1 MM cases for which all data were available. Number (N) of positive cases is indicated for each variable. Hazard Ratio (HR), 95% Confidence Interval and Log-rank p-value are reported for each variable. In red bold are depicted all significant variables after BH correction. \*= $p \leq 0.05$ ; \*\*= $p \leq 0.01$ ; \*\*\*= $p \leq 0.001$ ; \*\*\*\*= $p \leq 0.0001$

| Conditions             | $\lambda$ chain | Ki67 | HES6 | JAG2 |
|------------------------|-----------------|------|------|------|
| Non transplanted       | -               | -    | -    | -    |
| U266 <sup>SCR</sup>    | 60%             | 35%  | 80%  | 90%  |
| U266 <sup>SCR</sup>    | 75%             | 60%  | 75%  | 90%  |
| U266 <sup>SCR</sup>    | 45%             | 30%  | 45%  | 90%  |
| U266 <sup>SCR</sup>    | 65%             | 40%  | 65%  | 50%  |
| U266 <sup>J1/2KD</sup> | 55%             | 40%  | 55%  | 50%  |
| U266 <sup>J1/2KD</sup> | 15%             | 20%  | 15%  | 10%  |
| U266 <sup>J1/2KD</sup> | 15%             | 15%  | 15%  | 8%   |
| U266 <sup>J1/2KD</sup> | 8%              | 8%   | 8%   | 25%  |
| U266 <sup>J1/2KD</sup> | 12%             | 15%  | 15%  | 23%  |

**Table S1.** Summary table of the immunohistochemical results on the different bone marrow samples from mice xenografted with U266<sup>SCR</sup> and U266<sup>J1/2KD</sup> cells.

| Patient N | Light Chain | Infiltrating cells | JAG1 | JAG2 | Hes6 MM | Hes6 NM |
|-----------|-------------|--------------------|------|------|---------|---------|
|           |             |                    |      |      |         |         |
| 1         | κ           | 20                 | 50   | 20   | 5       | 5       |
| 2         | λ           | 12                 | 30   | 35   | 15      | 5       |
| 3         | λ           | 20                 | 30   | 20   | 9       | 5       |
| 4         | λ           | 25                 | 40   | 20   | 20      | 9       |
| 5         | λ           | 10                 | 15   | 15   | 5       | 9       |
| 6         | λ           | 20                 | 20   | 65   | 35      | 5       |
| 7         | κ           | 10                 | 25   | 70   | 40      | 5       |
| 8         | κ           | 20                 | 35   | 65   | 40      | 9       |
| 9         | λ           | 20                 | 30   | 65   | 25      | 5       |
| 10        | λ           | 13                 | 25   | 55   | 35      | 5       |
| 11        | λ           | 40                 | 25   | 65   | 40      | 5       |
| 12        | κ           | 30                 | 30   | 70   | 55      | 15      |
| 13        | λ           | 45                 | 35   | 70   | 15      | 15      |
| 14        | κ           | 45                 | 40   | 65   | 20      | 5       |
| 15        | κ           | 40                 | 40   | 70   | 45      | 20      |
| 16        | κ           | 27                 | 40   | 40   | 15      | 15      |
| 17        | κ           | 45                 | 85   | 35   | 50      | 10      |
| 18        | κ           | 45                 | 60   | 70   | 60      | 10      |
| 19        | κ           | 35                 | 80   | 75   | 70      | 5       |
| 20        | λ           | 45                 | 55   | 65   | 65      | 15      |
| 21        | κ           | 45                 | 60   | 70   | 70      | 20      |
| 22        | κ           | 80                 | 30   | 85   | 55      | 20      |
| 23        | κ           | 90                 | 80   | 75   | 60      | 15      |
| 24        | λ           | 60                 | 65   | 60   | 70      | 15      |
| 25        | λ           | 70                 | 80   | 90   | 80      | 10      |
| 26        | κ           | 90                 | 70   | 95   | 85      | 20      |
| 27        | κ           | 70                 | 75   | 75   | 45      | 20      |
| 28        | κ           | 70                 | 55   | 80   | 60      | 25      |
| 29        | κ           | 90                 | 80   | 80   | 80      | 35      |
| 30        | κ           | 70                 | 80   | 80   | N.A.    | 25      |
| 31        | κ           | 90                 | 75   | 85   | 80      | 20      |
| 32        | λ           | 95                 | 85   | 90   | 85      | 40      |
| 33        | κ           | 90                 | 70   | 80   | 80      | 35      |
| 34        | κ           | 70                 | 80   | 90   | 90      | 20      |

**Table S2.** Summary table of the immunohistochemical results on the collected bone marrow biopsies (BMB) of 34 MM patients at disease onset analyzed for the immunoreactivity to monoclonal light chains and the percentage of malignant plasma cells, JAG ligands and HES6 expression in MM cells and BM non-malignant (NM) surrounding cells. Data on this table were previously published (15) with the exception of the percentage infiltrating MM cells obtained by a microscopy analysis of previously stained BMBs (15).
